# Supplementary material for: Cooling Crystallization with Complex Temperature Profiles on a Quasi-Continuous and Modular Plant
Source: MDPI journal article supplement (doi:10.3390/pr10061047), 2022-05-24
Supplement: s1 [file s1]

Archive with 2 entries (2 files):
- processes-1721997-supplementary/processes-1721997-supplementary.pdf
- processes-1721997-supplementary/Video S1.mp4
